# Supplementary material
Source: Springer Nature journal article supplement (https://www.springermedizin.de/resource/supplementary/12890_2013_418_MOESM2_ESM.pdf/9505170)

**A**

Exhaled ethanol (ppb)

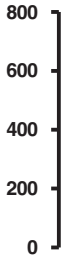 $p > 0.05$ 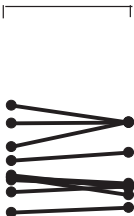

Baseline

Breath hold

**B**

Exhaled acetone (ppb)

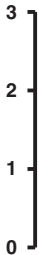 $p = 0.03$ 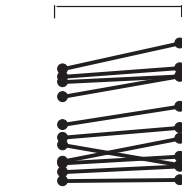

Baseline

Breath hold

Supplement: MOESM2 [file 9505170]
